# Supplementary material for: Response of N2O production rate to ocean acidification in the western North Pacific
Source: Springer Nature journal article supplement (doi:10.1038/s41558-019-0605-7), 2019-11-11
Supplement: 41558_2019_605_MOESM1_ESM.pdf [file 41558_2019_605_MOESM1_ESM.pdf]

In the format provided by the authors and unedited.

# Response of N<sub>2</sub>O production rate to ocean acidification in the western North Pacific

Florian Breider <sup>1,2\*</sup>, Chisato Yoshikawa <sup>3</sup>, Akiko Makabe<sup>4</sup>, Sakae Toyoda <sup>5</sup>, Masahide Wakita <sup>6</sup>, Yohei Matsui <sup>7</sup>, Shinsuke Kawagucci<sup>4</sup>, Tetsuichi Fujiki<sup>6</sup>, Naomi Harada <sup>6</sup> and Naohiro Yoshida <sup>1,5,8</sup>

---

<sup>1</sup>Department of Environmental Chemistry and Engineering, Tokyo Institute of Technology, Yokohama, Japan. <sup>2</sup>Institute of Environmental Engineering, Ecole Polytechnique Fédérale de Lausanne, Lausanne, Switzerland. <sup>3</sup>MRU, Japan Agency of Marine-Earth Science and Technology, Yokosuka, Japan. <sup>4</sup>X-star, Japan Agency of Marine-Earth Science and Technology, Yokosuka, Japan. <sup>5</sup>School of Materials and Chemical Technology, Tokyo Institute of Technology, Yokohama, Japan. <sup>6</sup>RIGC, Japan Agency of Marine Earth Science and Technology, Yokosuka, Japan. <sup>7</sup>Atmosphere and Ocean Research Institute, The University of Tokyo, Kashiwa, Japan. <sup>8</sup>Earth-Life Science Institute, Tokyo Institute of Technology, Tokyo, Japan. \*e-mail: [florian.breider@epfl.ch](mailto:florian.breider@epfl.ch)

# Response of N<sub>2</sub>O production rate to ocean acidification in the western North Pacific

Florian Breider <sup>1,2\*</sup>, Chisato Yoshikawa <sup>3</sup>, Akiko Makabe <sup>4</sup>, Sakae Toyoda <sup>5</sup>, Masahide Wakita <sup>6</sup>, Yohei Matsui <sup>7</sup>, Shinsuke Kawagucci <sup>4</sup>, Tetsuichi Fujiki <sup>6</sup>, Naomi Harada <sup>6</sup>, Naohiro Yoshida <sup>1,5,8</sup>

<sup>1</sup> Tokyo Institute of Technology, Department of Environmental Chemistry and Engineering, Nagatsuta 4259, Midori-ku, Yokohama, 226-8502 Kanagawa, Japan

<sup>2</sup> Ecole Polytechnique Fédérale de Lausanne - EPFL, Institute of Environmental Engineering, Station 2, CH-1015 Lausanne, Switzerland

<sup>3</sup> Research Institute for Marine Resources Utilization, Japan Agency of Marine Earth Science and Technology, 2-15 Natsushima-cho, Yokosuka-city 237-0061, Japan

<sup>4</sup> Institute for Extra-cutting-edge Science and Technology Avant-garde Research (X-star), Japan Agency of Marine Earth Science and Technology, 2-15 Natsushima-cho, Yokosuka-city 237-0061, Japan

<sup>5</sup> Tokyo Institute of Technology, School of Materials and Chemical Technology, Nagatsuta 4259, Midori-ku, Yokohama, 226-8502 Kanagawa, Japan

<sup>6</sup> Research Institute for Global Change (RIGC), Japan Agency of Marine Earth Science and Technology, 2-15 Natsushima-cho, Yokosuka-city 237-0061, Japan

<sup>7</sup> Atmosphere and Ocean Research Institute, The University of Tokyo, 5-1-5, Kashiwanoha, Kashiwa-shi, Chiba 277-8564 Japan

<sup>8</sup> Tokyo Institute of Technology, Earth-Life Science Institute, Meguro, 152-8551 Tokyo, Japan

**\*corresponding author:**

Florian Breider, Ecole Polytechnique Fédérale de Lausanne - EPFL, Institute of Environmental Engineering, Station 2, CH-1015 Lausanne, Switzerland

e-mail: [florian.breider@epfl.ch](mailto:florian.breider@epfl.ch)

## SUPPLEMENTARY INFORMATION

**Table S1.** N<sub>2</sub>O isotope and isotopomers signatures and concentration of N<sub>2</sub>O, NH<sub>4</sub><sup>+</sup>, NO<sub>3</sub><sup>-</sup>, NO<sub>2</sub><sup>-</sup> measured at the stations S1, E1 and K2 (for more information see Breider et al. 2015).

| Station | Depth<br>m | $\delta^{15}\text{N}$<br>‰<br>vs. N <sub>2,air</sub> | $\delta^{18}\text{O}$<br>‰<br>vs. SMOW | $SP$<br>‰<br>vs. N <sub>2,air</sub> | $\phi_{\text{ND}}$<br>% | N <sub>2</sub> O<br>nmol kg <sup>-1</sup> | NH <sub>4</sub> <sup>+</sup><br>μmol kg <sup>-1</sup> | NO <sub>3</sub> <sup>-</sup><br>μmol kg <sup>-1</sup> | NO <sub>2</sub> <sup>-</sup><br>μmol kg <sup>-1</sup> |
|---------|------------|------------------------------------------------------|----------------------------------------|-------------------------------------|-------------------------|-------------------------------------------|-------------------------------------------------------|-------------------------------------------------------|-------------------------------------------------------|
| S1      | 175        | 6.95                                                 | 43.74                                  | 22.17                               | 38                      | 8.82                                      | 0.06                                                  | 2.44                                                  | 0.05                                                  |
| S1      | 200        | 6.28                                                 | 43.92                                  | 17.74                               | 51                      | 10.42                                     | 0.03                                                  | 4.37                                                  | 0.02                                                  |
| S2      | 150        | -                                                    | -                                      | -                                   | -                       | -                                         | -                                                     | 1.13                                                  | 0.18                                                  |
| S2      | 200        | -                                                    | -                                      | -                                   | -                       | -                                         | -                                                     | 2.82                                                  | 0.02                                                  |
| E1      | 100        | 6.39                                                 | 45.11                                  | 25.30                               | 30                      | 16.07                                     | 0.06                                                  | 15.11                                                 | 0.02                                                  |
| E1      | 140        | 6.88                                                 | 45.52                                  | 21.83                               | 39                      | 14.24                                     | 0.05                                                  | 17.50                                                 | 0.02                                                  |
| K2      | 100        | 6.67                                                 | 44.85                                  | 17.82                               | 51                      | 12.91                                     | 0.03                                                  | 24.45                                                 | 0.77                                                  |
| K2      | 175        | 8.13                                                 | 53.55                                  | 25.78                               | 28                      | 25.25                                     | <0.01                                                 | 38.72                                                 | 0.02                                                  |
| KNOT    | 100        | -                                                    | -                                      | -                                   | -                       | -                                         | 0.01                                                  | 27.73                                                 | 0.01                                                  |
| KNOT    | 200        | -                                                    | -                                      | -                                   | -                       | -                                         | 0.01                                                  | 37.47                                                 | 0.01                                                  |

**Table S2.** Compilation of pH values, tracer concentration, depth, incubation time and temperature, nitrification and N<sub>2</sub>O production rates for all experiments conducted in WNP in 2013 and 2016.

| Station/<br>Experiment | Date            | Depth<br>(m) | <sup>15</sup> N tracer conc.<br>(nmol/L) | Incub.<br>time<br>(h) | Incub.<br>temp.<br>(°C) | natural<br>pH | ΔpH for<br>V <sub>NO<sub>x</sub></sub> | V NO <sub>x</sub><br>(nmol/L/day) | ΔpH for<br>V <sub>N<sub>2</sub>O</sub> | V N <sub>2</sub> O<br>total (pmol/L/day) |
|------------------------|-----------------|--------------|------------------------------------------|-----------------------|-------------------------|---------------|----------------------------------------|-----------------------------------|----------------------------------------|------------------------------------------|
| <b>S1<sub>A</sub></b>  | <b>15/07/13</b> | 175          | 185                                      | 12                    | 18                      | 7.97          | 0.00                                   | 8.4                               | 0.00                                   | <LOQ                                     |
|                        |                 |              |                                          |                       |                         |               | 0.00                                   | 7.1                               | 0.01                                   | <LOQ                                     |
|                        |                 |              |                                          |                       |                         |               | 0.16                                   | 11.2                              | 0.31                                   | <LOQ                                     |
|                        |                 |              |                                          |                       |                         |               |                                        |                                   | 0.46                                   | 0.2                                      |
| <b>S1<sub>B</sub></b>  |                 | 200          | 185                                      | 12                    | 18                      | 7.96          | 0.00                                   | 10.7                              | 0.00                                   | 0.6                                      |
|                        |                 |              |                                          |                       |                         |               | 0.00                                   | 8.3                               | 0.03                                   | 0.2                                      |
|                        |                 |              |                                          |                       |                         |               | 0.18                                   | 10.7                              | 0.29                                   | 0.5                                      |
|                        |                 |              |                                          |                       |                         |               | 0.20                                   | 11.3                              |                                        |                                          |
| <b>K2<sub>A</sub></b>  | <b>23/07/13</b> | 100          | 185                                      | 24                    | 4                       | 7.62          | 0.00                                   | 36.1                              | 0.00                                   | 5.7                                      |
|                        |                 |              |                                          |                       |                         |               | 0.00                                   | 37.7                              | 0.02                                   | 5.7                                      |
|                        |                 |              |                                          |                       |                         |               | 0.03                                   | 37.5                              | 0.11                                   | 6.0                                      |
|                        |                 |              |                                          |                       |                         |               | 0.14                                   | 35.2                              | 0.13                                   | 8.9                                      |
|                        |                 |              |                                          |                       |                         |               | 0.14                                   | 34.2                              | 0.24                                   | 12.0                                     |
|                        |                 |              |                                          |                       |                         |               | 0.14                                   | 35.1                              | 0.25                                   | 16.2                                     |
| <b>K2<sub>B</sub></b>  |                 | 175          | 185                                      | 24                    | 4                       | 7.30          | 0.00                                   | 17.0                              | 0.00                                   | 9.4                                      |
|                        |                 |              |                                          |                       |                         |               | 0.02                                   | 20.5                              | 0.03                                   | 2.3                                      |
|                        |                 |              |                                          |                       |                         |               | 0.18                                   | 17.3                              | 0.13                                   | 4.3                                      |
|                        |                 |              |                                          |                       |                         |               | 0.20                                   | 15.9                              | 0.17                                   | 6.0                                      |
| <b>E1<sub>A</sub></b>  | <b>27/07/13</b> | 100          | 185                                      | 25                    | 7                       | 7.75          | 0.00                                   | 49.0                              | 0.00                                   | 1.8                                      |
|                        |                 |              |                                          |                       |                         |               | 0.00                                   | 50.9                              | 0.00                                   | 1.9                                      |
|                        |                 |              |                                          |                       |                         |               | 0.08                                   | 32.8                              | 0.51                                   | 3.6                                      |
|                        |                 |              |                                          |                       |                         |               | 0.10                                   | 31.6                              | 0.55                                   | 2.7                                      |
|                        |                 |              |                                          |                       |                         |               | 0.26                                   | 27.9                              | 0.57                                   | 2.7                                      |
|                        |                 |              |                                          |                       |                         |               | 0.27                                   | 27.7                              | 0.57                                   | 4.2                                      |
| <b>E1<sub>B</sub></b>  |                 | 140          | 185                                      | 25                    | 7                       | 7.67          | 0.00                                   | 42.3                              | 0.00                                   | 1.6                                      |
|                        |                 |              |                                          |                       |                         |               | 0.02                                   | 37.1                              | 0.00                                   | 1.8                                      |
|                        |                 |              |                                          |                       |                         |               | 0.14                                   | 49.9                              | 0.03                                   | 2.6                                      |
|                        |                 |              |                                          |                       |                         |               | 0.15                                   | 50.8                              | 0.08                                   | 2.6                                      |
|                        |                 |              |                                          |                       |                         |               | 0.26                                   | 44.0                              | 0.11                                   | 4.1                                      |

|                         |                 |     |    |    |    |      |       |      |       |      |
|-------------------------|-----------------|-----|----|----|----|------|-------|------|-------|------|
|                         |                 |     |    |    |    |      | 0.293 | 46.5 | 0.162 | 3.7  |
| <b>S2</b>               | <b>08/07/16</b> | 150 | 52 | 15 | 18 | 8.07 | 0.00  | 7.5  | 0.00  | <LOQ |
|                         |                 |     |    |    |    |      | 0.01  | 6.6  | 0.01  | <LOQ |
|                         |                 |     |    |    |    |      | 0.027 | 6.9  | 0.02  | <LOQ |
|                         |                 |     |    |    |    |      | 0.027 | 7.7  |       |      |
| <b>S2</b>               | <b>08/07/16</b> | 200 | 52 | 15 | 18 | 8.07 | 0.00  | 4.1  | 0.10  | <LOQ |
|                         |                 |     |    |    |    |      | 0.04  | 4.4  | 0.16  | <LOQ |
|                         |                 |     |    |    |    |      | 0.16  | 4.4  | 0.20  | <LOQ |
|                         |                 |     |    |    |    |      | 0.18  | 3.7  |       |      |
|                         |                 |     |    |    |    |      | 0.19  | 4.7  |       |      |
|                         |                 |     |    |    |    |      | 0.20  | 5.4  |       |      |
| <b>KNOT<sub>A</sub></b> | <b>19/11/16</b> | 100 | 51 | 14 | 5  | 7.87 | 0.00  | 26.9 | 0.00  | 6.3  |
|                         |                 |     |    |    |    |      | 0.01  | 25.0 | 0.01  | 5.9  |
|                         |                 |     |    |    |    |      | 0.10  | 23.9 | 0.10  | 6.9  |
|                         |                 |     |    |    |    |      | 0.17  | 24.6 | 0.17  | 7.2  |
|                         |                 |     |    |    |    |      | 0.21  | 23.5 | 0.21  | 13.2 |
|                         |                 |     |    |    |    |      | 0.22  | 22.8 | 0.22  | 10.6 |
| <b>KNOT<sub>B</sub></b> |                 |     |    | 28 | 5  | 7.87 | 0.00  | 24.9 | 0.00  | 5.5  |
|                         |                 |     |    |    |    |      | 0.23  | 23.4 | 0.23  | 6.3  |
|                         |                 |     |    |    |    |      | 0.29  | 20.0 | 0.29  | 6.4  |
|                         |                 |     |    |    |    |      | 0.30  | 21.9 | 0.30  | 9.0  |
| <b>KNOT<sub>C</sub></b> |                 | 259 |    | 28 | 5  | 7.87 | 0.00  | 21.9 | 0.00  | 4.7  |
|                         |                 |     |    |    |    |      | 0.05  | 20.5 | 0.05  | 4.8  |
|                         |                 |     |    |    |    |      | 0.07  | 21.2 | 0.07  | 4.6  |
|                         |                 |     |    |    |    |      | 0.21  | 20.9 | 0.21  | 5.9  |
|                         |                 |     |    |    |    |      | 0.25  | 19.6 | 0.25  | 7.8  |
|                         |                 |     |    |    |    |      | 0.25  | 19.8 | 0.25  | 8.0  |
| <b>KNOT<sub>D</sub></b> |                 | 150 | 51 | 13 | 5  | 7.67 | 0.00  | 24.8 | 0.00  | 31.9 |
|                         |                 |     |    |    |    |      | 0.05  | 23.5 | 0.05  | 33.4 |
|                         |                 |     |    |    |    |      | 0.09  | 22.5 | 0.09  | 34.8 |
|                         |                 |     |    |    |    |      | 0.14  | 22.5 | 0.14  | 37.3 |
| <b>KNOT<sub>E</sub></b> |                 |     |    | 26 | 5  | 7.67 | 0.01  | 22.0 | 0.01  | 22.1 |
|                         |                 |     |    |    |    |      | 0.03  | 22.0 | 0.03  | 23.4 |
|                         |                 |     |    |    |    |      | 0.17  | 19.2 | 0.17  | 29.9 |
|                         |                 |     |    |    |    |      | 0.18  | 18.3 | 0.18  | 28.5 |
| <b>KNOT<sub>F</sub></b> |                 | 259 |    | 26 | 5  | 7.67 | 0.00  | 21.0 | 0.00  | 24.0 |
|                         |                 |     |    |    |    |      | 0.05  | 19.2 | 0.05  | 22.0 |

|      |      |      |      |
|------|------|------|------|
| 0.05 | 18.9 | 0.05 | 18.9 |
| 0.09 | 18.1 | 0.09 | 22.6 |
| 0.20 | 18.6 | 0.20 | 25.5 |
| 0.20 | 18.4 | 0.20 | 41.3 |

---

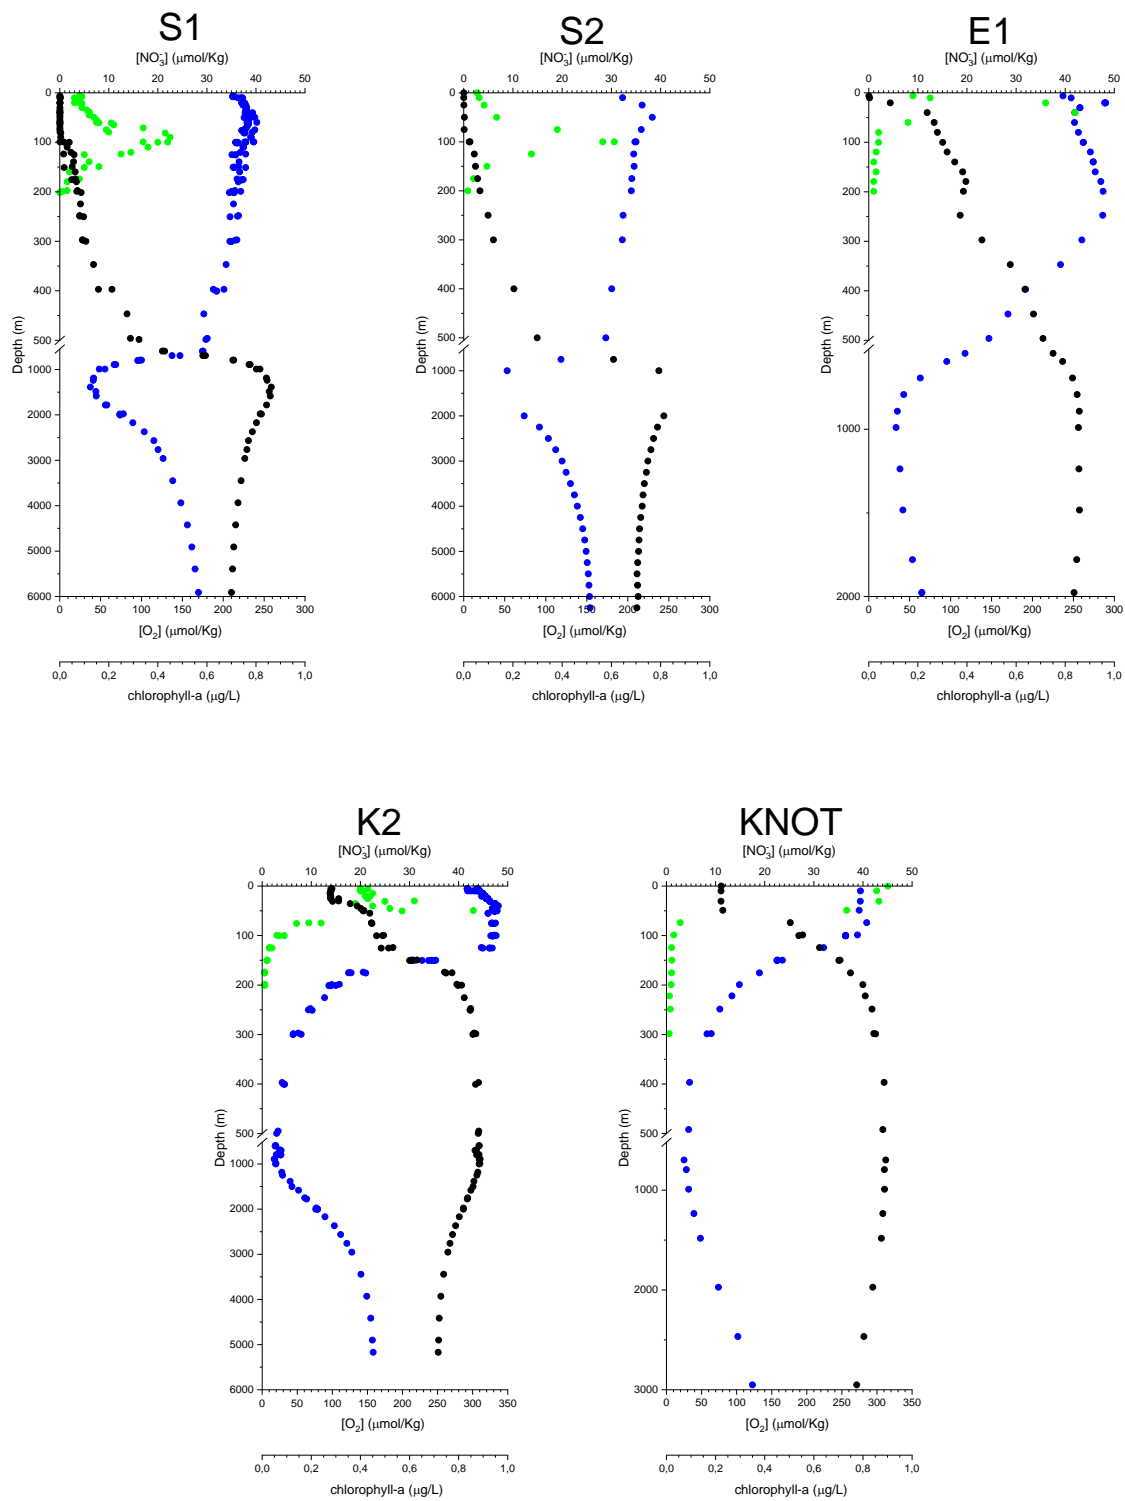

**Figure S1.** Oxygen (blue), chlorophyll-*a* (green) and nitrate (black) concentrations measured at the stations S1, S2, E1, K2 and KNOT.

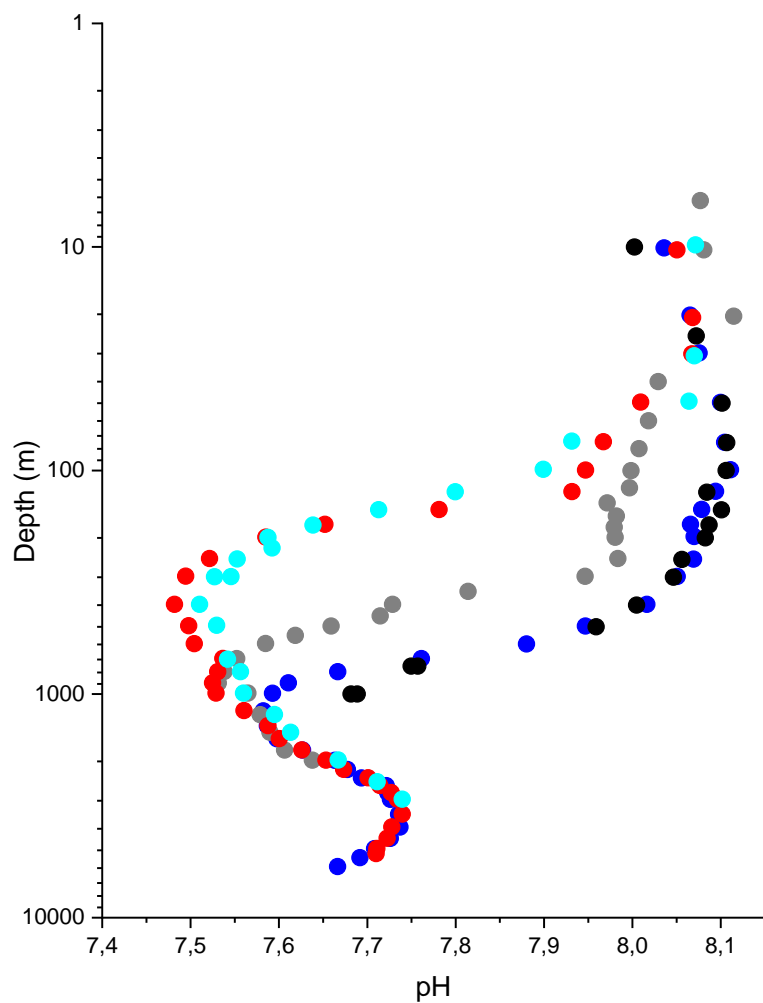

**Figure S2.** pH profiles measured at the stations K2 (red circles), KNOT (cyan circles), E1 (grey circles), S1 (blue circles) and S2 (black circles). The pH values were calculated using the CO2SYS program developed by Lewis and Wallace (1998).<sup>1</sup> The carbonate dissociation constants of Mehrbach et al. (1973) refitted by Dickson and Millero (1987), temperature, salinity, DIC, total alkalinity, phosphate, and silicate were used to calculate the pH (total scale) at the in situ temperature.<sup>2,3</sup>



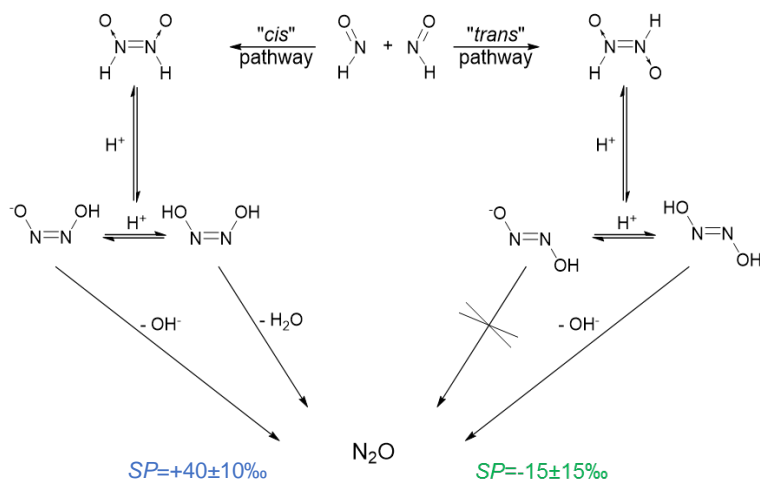

**Figure S3.** Acid-base equilibria model for the HNO dimerization mechanism. SP values corresponds to <sup>15</sup>N site-preference values for *cis* (blue: nitrification) and *trans*-pathways (green: nitrifier-denitrification). More details on the reaction mechanisms are available in Fehling and Friedrichs (2011) and Fehling (2012).

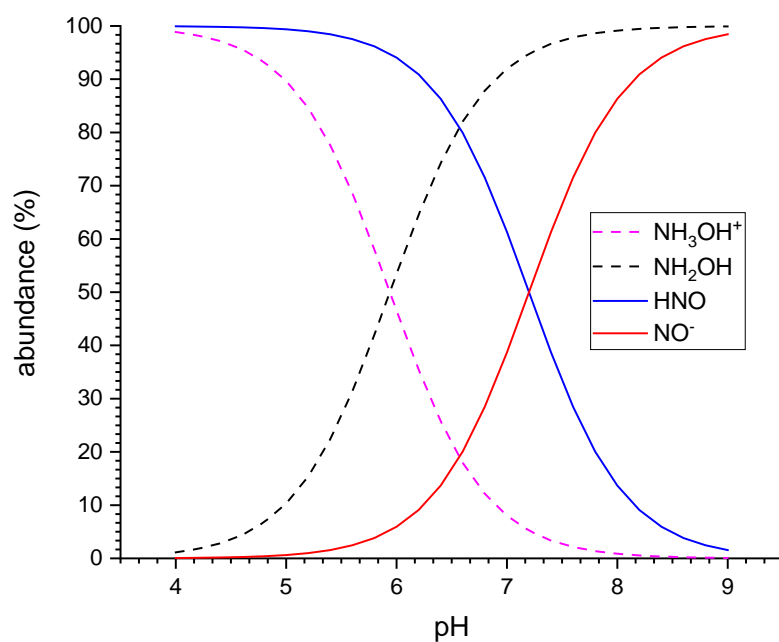

**Figure S4.** Speciation of HNO and NH<sub>2</sub>OH as function of pH.
